# Supplementary figures and images for: HER2 decreases drug sensitivity of ovarian cancer cells via inducing stem cell-like property in an NFκB-dependent way
Source: Oxford University Press journal article supplement (doi:10.1042/bsr20180829), 2018-10-12

A OVCAR-5 IGROV-1

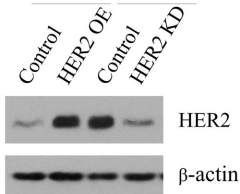

B

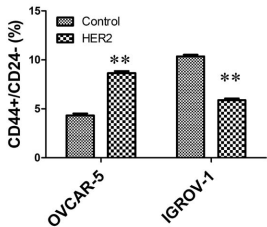

C

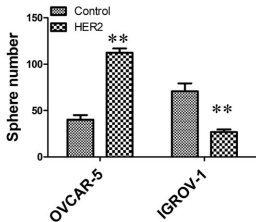

A

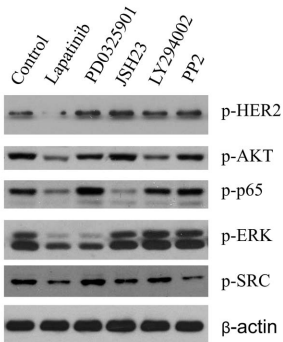

B

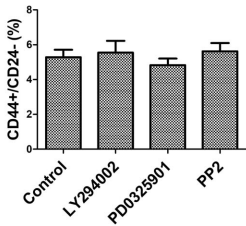

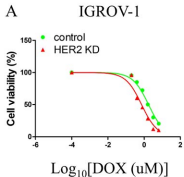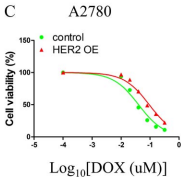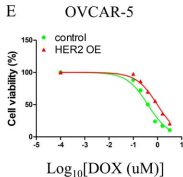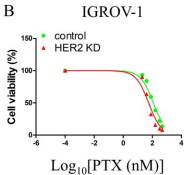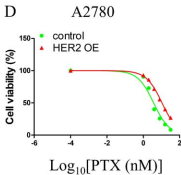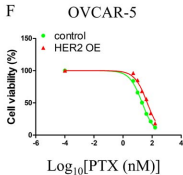

Supplement: bsr-2018-0829_supp.pdf [file bsr-2018-0829_supp.pdf]
